# Supplementary material for: Cancer risks in Lynch syndrome, Lynch-like syndrome, and familial colorectal cancer type X: a prospective cohort study
Source: Springer Nature journal article supplement (doi:10.1186/s12885-020-06926-x), 2020-05-24
Supplement: MOESM1 [file 18009018]

## **Additional file 1**

### **Title: Cancer risks in Lynch syndrome, Lynch-like syndrome, and familial colorectal cancer type X: A prospective cohort study**

Karolin Bucksch, Silke Zachariae, Stefan Aretz, Reinhard Büttner, Elke Holinski-Feder, Stefanie Holzapfel, Robert Hüneburg, Matthias Kloor, Magnus von Knebel Doeberitz, Monika Morak, Gabriela Möslein, Jacob Nattermann, Claudia Perne, Nils Rahner, Wolff Schmiegel, Karsten Schulmann, Verena Steinke-Lange, Christian P. Strassburg, Deepak B. Vangala, Jürgen Weitz, Markus Loeffler, Christoph Engel

on behalf of the German Consortium for Familial Intestinal Cancer

#### **Supplemental information**

|             |                                                                                                                                  |         |
|-------------|----------------------------------------------------------------------------------------------------------------------------------|---------|
| Table S1:   | Characteristics of female patients.                                                                                              | page 2  |
| Table S2:   | Characteristics of male patients.                                                                                                | page 3  |
| Table S3:   | Number of patients, observation times (person-years) and number of incident cancers.                                             | page 4  |
| Table S4:   | Types of incident cancers considered as "any cancer".                                                                            | page 5  |
| Table S5:   | Cumulative cancer risks (%) by age for female patients.                                                                          | page 6  |
| Table S6:   | Cumulative cancer risks (%) by age for male patients.                                                                            | page 7  |
| Figure S7:  | Age-dependent cumulative cancer risks by risk group and sex.                                                                     | page 8  |
| Figure S8:  | Age-dependent cumulative cancer risks of LS patients by gene and sex.                                                            | page 9  |
| Figure S9:  | Comparison with general population risks: standardised incidence ratios (SIRs) with 95% confidence interval for female patients. | page 10 |
| Figure S10: | Comparison with general population risks: standardised incidence ratios (SIRs) with 95% confidence interval for male patients.   | page 11 |

**Table S1:** Characteristics of female patients.

|                                                                              | <u>FCCX</u> | <u>LLS</u> | <u>LS</u>            |                      |                     | <u>Total</u> |
|------------------------------------------------------------------------------|-------------|------------|----------------------|----------------------|---------------------|--------------|
|                                                                              | n=59        | n=315      | <u>MLH1</u><br>n=222 | <u>MSH2</u><br>n=265 | <u>MSH6</u><br>n=63 | n=924        |
| <b>Individuals at risk, number</b>                                           |             |            |                      |                      |                     |              |
| Any                                                                          | 21          | 77         | 72                   | 86                   | 28                  | 284          |
| Colorectal                                                                   | 22          | 94         | 86                   | 123                  | 35                  | 360          |
| Stomach                                                                      | 59          | 312        | 220                  | 261                  | 63                  | 915          |
| Small bowel                                                                  | 59          | 310        | 218                  | 260                  | 63                  | 910          |
| Urothelial                                                                   | 59          | 312        | 221                  | 255                  | 62                  | 909          |
| <b>Age at start of prospective observation, median (interquartile range)</b> |             |            |                      |                      |                     |              |
| Any                                                                          | 41 (36-55)  | 39 (29-48) | 37 (28-41)           | 36 (30-43)           | 40 (38-46)          | 38 (31-45)   |
| Colorectal                                                                   | 41 (36-54)  | 42 (32-52) | 38 (29-46)           | 41 (33-50)           | 42 (39-50)          | 40 (33-50)   |
| Stomach                                                                      | 48 (41-55)  | 44 (38-52) | 44 (35-55)           | 45 (36-54)           | 45 (38-57)          | 45 (37-54)   |
| Small bowel                                                                  | 48 (41-55)  | 44 (38-52) | 44 (35-55)           | 45 (36-54)           | 45 (38-57)          | 45 (37-54)   |
| Urothelial                                                                   | 48 (41-55)  | 44 (38-52) | 44 (35-55)           | 44 (36-53)           | 44 (38-57)          | 45 (37-54)   |
| <b>Median follow-up time, person-years</b>                                   |             |            |                      |                      |                     |              |
| Any                                                                          | 8.3         | 7.1        | 6.6                  | 6.6                  | 6.8                 | 6.9          |
| Colorectal                                                                   | 8.6         | 7.0        | 6.6                  | 7.3                  | 7.1                 | 7.0          |
| Stomach                                                                      | 7.3         | 6.5        | 6.7                  | 8.1                  | 7.4                 | 7.1          |
| Small bowel                                                                  | 7.3         | 6.5        | 6.5                  | 8.0                  | 7.4                 | 7.1          |
| Urothelial                                                                   | 7.3         | 6.4        | 6.6                  | 7.9                  | 7.5                 | 7.0          |
| <b>Cumulative follow-up time, person-years</b>                               |             |            |                      |                      |                     |              |
| Any                                                                          | 175         | 539        | 521                  | 576                  | 209                 | 2020         |
| Colorectal                                                                   | 187         | 652        | 617                  | 884                  | 286                 | 2626         |
| Stomach                                                                      | 439         | 2144       | 1573                 | 2016                 | 477                 | 6649         |
| Small bowel                                                                  | 439         | 2119       | 1542                 | 2006                 | 477                 | 6583         |
| Urothelial                                                                   | 439         | 2120       | 1566                 | 1935                 | 474                 | 6534         |
| <b>Individuals with incident cancer, number</b>                              |             |            |                      |                      |                     |              |
| Any                                                                          | 2           | 5          | 8                    | 15                   | 3                   | 33           |
| Colorectal                                                                   | 0           | 2          | 2                    | 12                   | 1                   | 17           |
| Stomach                                                                      | 0           | 1          | 1                    | 3                    | 0                   | 5            |
| Small bowel                                                                  | 0           | 1          | 4                    | 5                    | 0                   | 10           |
| Urothelial                                                                   | 0           | 3          | 2                    | 7                    | 0                   | 12           |

**Table S2:** Characteristics of male patients.

|                                                                              | <u>FCCX</u> | <u>LLS</u> | <u>LS</u>            |                      |                     | <u>Total</u> |
|------------------------------------------------------------------------------|-------------|------------|----------------------|----------------------|---------------------|--------------|
|                                                                              | n=57        | n=279      | <u>MLH1</u><br>n=225 | <u>MSH2</u><br>n=284 | <u>MSH6</u><br>n=61 | n=906        |
| <b>Individuals at risk, number</b>                                           |             |            |                      |                      |                     |              |
| Any                                                                          | 19          | 43         | 44                   | 72                   | 20                  | 198          |
| Colorectal                                                                   | 20          | 46         | 47                   | 83                   | 22                  | 218          |
| Stomach                                                                      | 56          | 272        | 219                  | 278                  | 61                  | 886          |
| Small bowel                                                                  | 57          | 276        | 211                  | 276                  | 61                  | 881          |
| Urothelial                                                                   | 57          | 273        | 224                  | 269                  | 60                  | 883          |
| <b>Age at start of prospective observation, median (interquartile range)</b> |             |            |                      |                      |                     |              |
| Any                                                                          | 39 (34-47)  | 39 (30-43) | 34 (30-44)           | 36 (29-43)           | 37 (31-58)          | 36 (30-44)   |
| Colorectal                                                                   | 39 (34-48)  | 40 (30-45) | 35 (30-44)           | 37 (30-46)           | 40 (31-59)          | 37 (31-46)   |
| Stomach                                                                      | 49 (41-56)  | 44 (38-51) | 44 (35-53)           | 44 (36-51)           | 44 (34-55)          | 44 (37-52)   |
| Small bowel                                                                  | 49 (41-56)  | 44 (38-51) | 44 (35-52)           | 44 (36-52)           | 44 (34-55)          | 44 (37-52)   |
| Urothelial                                                                   | 49 (41-56)  | 44 (38-51) | 44 (36-53)           | 44 (36-51)           | 44 (34-54)          | 44 (37-52)   |
| <b>Median follow-up time, person-years</b>                                   |             |            |                      |                      |                     |              |
| Any                                                                          | 6.6         | 6.3        | 5.7                  | 6.3                  | 3.8                 | 6.2          |
| Colorectal                                                                   | 6.8         | 5.8        | 6.0                  | 6.6                  | 5.4                 | 6.3          |
| Stomach                                                                      | 7.0         | 6.3        | 7.8                  | 7.5                  | 4.2                 | 7.0          |
| Small bowel                                                                  | 7.0         | 6.3        | 7.8                  | 7.2                  | 4.2                 | 6.9          |
| Urothelial                                                                   | 7.0         | 6.3        | 7.7                  | 7.1                  | 4.1                 | 6.9          |
| <b>Cumulative follow-up time, person-years</b>                               |             |            |                      |                      |                     |              |
| Any                                                                          | 133         | 299        | 298                  | 529                  | 116                 | 1375         |
| Colorectal                                                                   | 142         | 312        | 320                  | 625                  | 132                 | 1531         |
| Stomach                                                                      | 415         | 1875       | 1728                 | 2207                 | 366                 | 6591         |
| Small bowel                                                                  | 419         | 1893       | 1670                 | 2158                 | 366                 | 6506         |
| Urothelial                                                                   | 419         | 1883       | 1749                 | 2071                 | 355                 | 6476         |
| <b>Individuals with incident cancer, number</b>                              |             |            |                      |                      |                     |              |
| Any                                                                          | 0           | 3          | 5                    | 12                   | 0                   | 20           |
| Colorectal                                                                   | 0           | 4          | 5                    | 7                    | 1                   | 17           |
| Stomach                                                                      | 0           | 3          | 3                    | 2                    | 0                   | 8            |
| Small bowel                                                                  | 0           | 0          | 5                    | 9                    | 0                   | 14           |
| Urothelial                                                                   | 1           | 1          | 7                    | 12                   | 0                   | 21           |

**Table S3:** Number of patients, observation times (person-years) and number of incident cancers.

| Cancer type      | Age group | FCCX |                 |                 | LLS |                 |                 | LS   |                 |                 |      |                 |                 |      |                 |                 |
|------------------|-----------|------|-----------------|-----------------|-----|-----------------|-----------------|------|-----------------|-----------------|------|-----------------|-----------------|------|-----------------|-----------------|
|                  |           | No*  | PY <sup>§</sup> | EV <sup>§</sup> | No* | PY <sup>§</sup> | EV <sup>§</sup> | MLH1 |                 |                 | MSH2 |                 |                 | MSH6 |                 |                 |
|                  |           |      |                 |                 |     |                 |                 | No*  | PY <sup>§</sup> | EV <sup>§</sup> | No*  | PY <sup>§</sup> | EV <sup>§</sup> | No*  | PY <sup>§</sup> | EV <sup>§</sup> |
| Any <sup>#</sup> | 25-<30    | 3    | 10              | 0               | 30  | 64              | 0               | 31   | 99              | 0               | 38   | 111             | 1               | 4    | 7               | 0               |
|                  | 30-<40    | 18   | 74              | 0               | 56  | 235             | 3               | 67   | 262             | 4               | 87   | 364             | 3               | 22   | 68              | 0               |
|                  | 40-<50    | 23   | 97              | 0               | 59  | 297             | 3               | 55   | 315             | 4               | 80   | 344             | 7               | 23   | 127             | 1               |
|                  | 50-<60    | 18   | 80              | 0               | 42  | 158             | 2               | 34   | 121             | 4               | 40   | 166             | 8               | 17   | 78              | 1               |
|                  | 60-<70    | 8    | 33              | 1               | 12  | 56              | 0               | 9    | 21              | 1               | 15   | 57              | 2               | 10   | 30              | 1               |
|                  | 70-<80    | 2    | 8               | 0               | 9   | 27              | 0               | 1    | 2               | 0               | 5    | 24              | 2               | 3    | 15              | 0               |
|                  | Total     | 39   | 301             | 1               | 120 | 838             | 8               | 116  | 819             | 13              | 154  | 1066            | 23              | 48   | 326             | 3               |
| Colorectal       | 25-<30    | 3    | 10              | 0               | 30  | 64              | 0               | 33   | 106             | 0               | 39   | 112             | 1               | 4    | 7               | 0               |
|                  | 30-<40    | 20   | 76              | 0               | 58  | 237             | 3               | 70   | 270             | 3               | 96   | 387             | 2               | 22   | 68              | 0               |
|                  | 40-<50    | 25   | 107             | 0               | 67  | 327             | 2               | 61   | 349             | 0               | 108  | 495             | 4               | 26   | 154             | 0               |
|                  | 50-<60    | 20   | 89              | 0               | 51  | 198             | 1               | 46   | 163             | 3               | 76   | 300             | 7               | 24   | 104             | 0               |
|                  | 60-<70    | 9    | 40              | 0               | 17  | 79              | 0               | 15   | 45              | 1               | 35   | 162             | 4               | 15   | 49              | 1               |
|                  | 70-<80    | 2    | 8               | 0               | 15  | 59              | 0               | 5    | 6               | 0               | 13   | 53              | 1               | 7    | 35              | 1               |
|                  | Total     | 42   | 329             | 0               | 140 | 964             | 6               | 133  | 938             | 7               | 206  | 1509            | 19              | 57   | 417             | 2               |
| Stomach          | 25-<30    | 4    | 11              | 0               | 46  | 101             | 0               | 47   | 142             | 0               | 54   | 161             | 0               | 5    | 8               | 0               |
|                  | 30-<40    | 24   | 94              | 0               | 166 | 601             | 0               | 145  | 596             | 0               | 174  | 648             | 0               | 42   | 135             | 0               |
|                  | 40-<50    | 58   | 219             | 0               | 326 | 1482            | 0               | 215  | 1036            | 0               | 282  | 1291            | 0               | 56   | 261             | 0               |
|                  | 50-<60    | 68   | 319             | 0               | 274 | 1087            | 2               | 200  | 817             | 1               | 256  | 1226            | 3               | 52   | 183             | 0               |
|                  | 60-<70    | 35   | 170             | 0               | 116 | 488             | 1               | 111  | 512             | 1               | 151  | 666             | 1               | 34   | 165             | 0               |
|                  | 70-<80    | 14   | 41              | 0               | 61  | 259             | 1               | 53   | 197             | 2               | 56   | 231             | 1               | 20   | 91              | 0               |
|                  | Total     | 115  | 854             | 0               | 584 | 4019            | 4               | 439  | 3300            | 4               | 539  | 4222            | 5               | 124  | 843             | 0               |
| Small bowel      | 25-<30    | 4    | 11              | 0               | 46  | 101             | 0               | 46   | 137             | 0               | 54   | 161             | 0               | 5    | 8               | 0               |
|                  | 30-<40    | 24   | 94              | 0               | 166 | 601             | 0               | 142  | 580             | 1               | 172  | 651             | 0               | 42   | 135             | 0               |
|                  | 40-<50    | 58   | 219             | 0               | 325 | 1475            | 1               | 212  | 1014            | 0               | 278  | 1258            | 3               | 56   | 261             | 0               |
|                  | 50-<60    | 69   | 323             | 0               | 276 | 1088            | 0               | 193  | 785             | 3               | 251  | 1199            | 6               | 52   | 183             | 0               |
|                  | 60-<70    | 35   | 170             | 0               | 117 | 490             | 0               | 109  | 503             | 4               | 154  | 674             | 4               | 34   | 165             | 0               |
|                  | 70-<80    | 14   | 41              | 0               | 61  | 257             | 0               | 52   | 192             | 1               | 54   | 221             | 1               | 20   | 91              | 0               |
|                  | Total     | 116  | 858             | 0               | 586 | 4011            | 1               | 429  | 3212            | 9               | 536  | 4164            | 14              | 124  | 843             | 0               |
| Urothelial       | 25-<30    | 4    | 11              | 0               | 46  | 101             | 0               | 47   | 142             | 0               | 54   | 161             | 0               | 5    | 8               | 0               |
|                  | 30-<40    | 24   | 94              | 0               | 166 | 601             | 0               | 145  | 596             | 0               | 173  | 651             | 0               | 42   | 135             | 0               |
|                  | 40-<50    | 58   | 219             | 0               | 327 | 1483            | 0               | 219  | 1046            | 1               | 278  | 1260            | 6               | 56   | 261             | 0               |
|                  | 50-<60    | 69   | 323             | 0               | 277 | 1096            | 2               | 202  | 821             | 4               | 244  | 1158            | 5               | 52   | 183             | 0               |
|                  | 60-<70    | 35   | 170             | 0               | 115 | 474             | 2               | 112  | 514             | 3               | 137  | 580             | 5               | 33   | 164             | 0               |
|                  | 70-<80    | 14   | 41              | 1               | 59  | 248             | 0               | 53   | 195             | 1               | 50   | 196             | 3               | 18   | 78              | 0               |
|                  | Total     | 116  | 858             | 1               | 585 | 4003            | 4               | 445  | 3314            | 9               | 524  | 4006            | 19              | 122  | 829             | 0               |
| Female breast    | 25-<30    | 3    | 8               | 0               | 29  | 65              | 0               | 26   | 80              | 0               | 28   | 88              | 0               | 1    | 3               | 0               |
|                  | 30-<40    | 13   | 54              | 0               | 85  | 320             | 0               | 76   | 294             | 0               | 84   | 300             | 0               | 21   | 64              | 0               |
|                  | 40-<50    | 31   | 119             | 0               | 172 | 750             | 2               | 101  | 474             | 1               | 126  | 577             | 1               | 36   | 169             | 2               |
|                  | 50-<60    | 35   | 157             | 1               | 142 | 532             | 0               | 87   | 346             | 2               | 111  | 540             | 3               | 29   | 109             | 0               |
|                  | 60-<70    | 14   | 67              | 0               | 65  | 286             | 0               | 51   | 237             | 0               | 79   | 341             | 2               | 14   | 80              | 1               |
|                  | 70-<80    | 6    | 15              | 0               | 35  | 140             | 1               | 25   | 108             | 0               | 31   | 117             | 0               | 9    | 26              | 1               |
|                  | Total     | 58   | 420             | 1               | 307 | 2093            | 3               | 214  | 1539            | 3               | 256  | 1963            | 6               | 60   | 451             | 4               |
| Ovarian          | 25-<30    | 3    | 8               | 0               | 29  | 65              | 0               | 25   | 78              | 0               | 27   | 86              | 0               | 1    | 3               | 0               |
|                  | 30-<40    | 12   | 53              | 0               | 82  | 310             | 0               | 75   | 292             | 0               | 77   | 282             | 1               | 21   | 64              | 0               |
|                  | 40-<50    | 30   | 119             | 0               | 156 | 675             | 0               | 89   | 406             | 0               | 100  | 431             | 2               | 31   | 159             | 0               |
|                  | 50-<60    | 35   | 164             | 0               | 122 | 435             | 0               | 66   | 261             | 0               | 70   | 280             | 1               | 20   | 72              | 0               |
|                  | 60-<70    | 14   | 64              | 0               | 49  | 214             | 0               | 42   | 187             | 0               | 47   | 234             | 1               | 10   | 49              | 0               |
|                  | 70-<80    | 5    | 8               | 0               | 26  | 105             | 0               | 17   | 68              | 0               | 23   | 84              | 0               | 6    | 21              | 0               |
|                  | Total     | 56   | 417             | 0               | 270 | 1805            | 0               | 187  | 1292            | 0               | 202  | 1397            | 5               | 48   | 368             | 0               |
| Endometrial      | 25-<30    | 3    | 8               | 0               | 29  | 65              | 0               | 25   | 75              | 0               | 28   | 88              | 0               | 1    | 3               | 0               |
|                  | 30-<40    | 12   | 53              | 0               | 83  | 316             | 0               | 72   | 271             | 0               | 74   | 285             | 1               | 20   | 58              | 0               |
|                  | 40-<50    | 26   | 98              | 0               | 148 | 604             | 3               | 80   | 363             | 6               | 89   | 375             | 5               | 32   | 144             | 1               |
|                  | 50-<60    | 32   | 144             | 0               | 101 | 338             | 2               | 45   | 166             | 1               | 46   | 163             | 6               | 15   | 64              | 0               |
|                  | 60-<70    | 14   | 64              | 0               | 38  | 169             | 0               | 23   | 92              | 1               | 22   | 96              | 1               | 8    | 35              | 0               |
|                  | 70-<80    | 5    | 8               | 0               | 22  | 90              | 0               | 6    | 26              | 1               | 7    | 13              | 0               | 3    | 11              | 0               |
|                  | Total     | 53   | 376             | 0               | 254 | 1581            | 5               | 152  | 994             | 9               | 163  | 1019            | 13              | 45   | 315             | 1               |

<sup>#</sup> Without malignant neoplasms of skin except melanoma

\* Number of patients who entered the subgroup in the corresponding age group

<sup>§</sup> Person-years

<sup>§</sup> Number of incident cancer events

**Table S4:** Types of incident cancers considered as "any cancer".

|                                              | FCCX | LLS | LS          |             |             | Total |
|----------------------------------------------|------|-----|-------------|-------------|-------------|-------|
|                                              |      |     | <i>MLH1</i> | <i>MSH2</i> | <i>MSH6</i> |       |
| <b>Patients with incident cancer, number</b> | 2    | 8   | 13          | 27          | 3           | 53    |
| Adrenal gland                                | 0    | 0   | 1           | 0           | 0           | 1     |
| Breast                                       | 0    | 0   | 1           | 2           | 0           | 3     |
| Colorectal                                   | 0    | 5   | 7           | 9           | 1           | 22    |
| Hepatobiliary                                | 0    | 0   | 0           | 3           | 0           | 3     |
| Malignant melanoma of skin                   | 0    | 0   | 1           | 1           | 0           | 2     |
| Malignant neoplasms of skin except melanoma  | 1    | 0   | 0           | 4           | 0           | 5     |
| Non-Hodgkin lymphoma                         | 0    | 1   | 0           | 0           | 0           | 1     |
| Ovary                                        | 0    | 0   | 0           | 2           | 0           | 2     |
| Pancreas                                     | 1    | 0   | 0           | 0           | 0           | 1     |
| Prostate                                     | 0    | 0   | 0           | 1           | 0           | 1     |
| Small bowel                                  | 0    | 0   | 0           | 2           | 0           | 2     |
| Urinary tract                                | 0    | 0   | 0           | 1           | 0           | 1     |
| Uterus                                       | 0    | 2   | 3           | 2           | 2           | 9     |

**Table S5:** Cumulative cancer risks (%) by age for female patients.

| Cancer type | Age (years) | FCCX            | LLS              | LS               | LS               |                  |                  |
|-------------|-------------|-----------------|------------------|------------------|------------------|------------------|------------------|
|             |             |                 |                  |                  | MLH1             | MSH2             | MSH6             |
| Any         | 40          | 0.0 (-)         | 12.8 (3.3-42.8)  | 10.9 (3.9-28.3)  | 12.0 (3.1-40.6)  | 13.5 (3.1-48.5)  | 0.0 (-)          |
|             | 50          | 14.3 (2.1-66.6) | 17.4 (5.9-45.4)  | 29.7 (18.7-45.1) | 27.0 (13.0-50.9) | 39.4 (21.6-64.4) | 10.0 (1.5-52.7)  |
|             | 60          | 14.3 (2.1-66.6) | 29.1 (13.0-57.1) | 47.6 (33.8-63.8) | 43.2 (23.1-70.4) | 60.7 (39.7-82.1) | 28.0 (7.2-76.2)  |
|             | 70          | 31.4 (8.8-78.7) | 29.1 (13.0-57.1) | 60.1 (42.0-78.7) | -                | 67.3 (45.7-87.0) | 64.0 (21.6-98.6) |
| Colorectal  | 40          | 0.0 (-)         | 12.6 (3.2-42.3)  | 6.6 (1.5-25.8)   | 5.3 (0.8-31.9)   | 10.0 (1.5-52.7)  | 0.0 (-)          |
|             | 50          | 0.0 (-)         | 12.6 (3.2-42.3)  | 10.9 (4.2-26.6)  | 5.3 (0.8-31.9)   | 18.9 (6.5-47.9)  | 0.0 (-)          |
|             | 60          | 0.0 (-)         | 12.6 (3.2-42.3)  | 18.5 (9.6-33.9)  | 12.0 (3.1-40.6)  | 29.2 (14.1-54.4) | 0.0 (-)          |
|             | 70          | 0.0 (-)         | 12.6 (3.2-42.3)  | 38.7 (23.1-60.0) | 12.0 (3.1-40.6)  | 49.6 (29.9-73.4) | 25.0 (3.9-87.2)  |
| Stomach     | 40          | 0.0 (-)         | 0.0 (-)          | 0.0 (-)          | 0.0 (-)          | 0.0 (-)          | 0.0 (-)          |
|             | 50          | 0.0 (-)         | 0.0 (-)          | 0.0 (-)          | 0.0 (-)          | 0.0 (-)          | 0.0 (-)          |
|             | 60          | 0.0 (-)         | 3.0 (0.4-19.6)   | 2.1 (0.5-8.2)    | 0.0 (-)          | 3.6 (0.9-13.6)   | 0.0 (-)          |
|             | 70          | 0.0 (-)         | 3.0 (0.4-19.6)   | 3.2 (1.0-9.8)    | 2.9 (0.4-19.1)   | 3.6 (0.9-13.6)   | 0.0 (-)          |
| Small bowel | 40          | 0.0 (-)         | 0.0 (-)          | 1.2 (0.2-8.4)    | 2.7 (0.4-17.7)   | 0.0 (-)          | 0.0 (-)          |
|             | 50          | 0.0 (-)         | 1.3 (0.2-8.6)    | 1.2 (0.2-8.4)    | 2.7 (0.4-17.7)   | 0.0 (-)          | 0.0 (-)          |
|             | 60          | 0.0 (-)         | 1.3 (0.2-8.6)    | 4.1 (1.5-10.5)   | 5.7 (1.5-21.1)   | 3.6 (0.9-13.8)   | 0.0 (-)          |
|             | 70          | 0.0 (-)         | 1.3 (0.2-8.6)    | 10.4 (5.2-20.2)  | 13.3 (5.0-32.4)  | 10.0 (3.7-25.3)  | 0.0 (-)          |
| Urothelial  | 40          | 0.0 (-)         | 0.0 (-)          | 0.0 (-)          | 0.0 (-)          | 0.0 (-)          | 0.0 (-)          |
|             | 50          | 0.0 (-)         | 0.0 (-)          | 1.6 (0.4-6.2)    | 0.0 (-)          | 3.3 (0.8-12.6)   | 0.0 (-)          |
|             | 60          | 0.0 (-)         | 3.2 (0.8-12.0)   | 4.3 (1.8-10.1)   | 2.5 (0.4-16.5)   | 6.7 (2.6-16.8)   | 0.0 (-)          |
|             | 70          | 0.0 (-)         | 6.6 (2.0-20.8)   | 9.1 (4.4-18.2)   | 2.5 (0.4-16.5)   | 15.9 (7.5-31.7)  | 0.0 (-)          |

**Table S6:** Cumulative cancer risks (%) by age for male patients.

| Cancer type | Age (years) | FCCX    | LLS              | LS               | LS               |                  |         |
|-------------|-------------|---------|------------------|------------------|------------------|------------------|---------|
|             |             |         |                  |                  | MLH1             | MSH2             | MSH6    |
| Any         | 40          | 0.0 (-) | 9.1 (1.3-49.2)   | 14.5 (6.3-31.5)  | 19.2 (5.0-59.0)  | 15.0 (5.1-40.1)  | 0.0 (-) |
|             | 50          | 0.0 (-) | 21.3 (7.3-53.3)  | 19.5 (9.8-36.6)  | 19.2 (5.0-59.0)  | 24.0 (10.7-48.5) | 0.0 (-) |
|             | 60          | 0.0 (-) | -                | 51.0 (32.4-72.8) | 44.5 (17.3-83.8) | 61.4 (37.0-86.0) | 0.0 (-) |
|             | 70          | 0.0 (-) | -                | 65.7 (43.7-86.4) | 100.0 (-)        | 80.7 (47.4-98.5) | 0.0 (-) |
| Colorectal  | 40          | 0.0 (-) | 9.1 (1.3-49.2)   | 11.4 (4.4-27.7)  | 17.9 (4.7-55.6)  | 9.9 (2.5-35.1)   | 0.0 (-) |
|             | 50          | 0.0 (-) | 21.3 (7.3-53.3)  | 13.5 (5.8-29.6)  | 17.9 (4.7-55.6)  | 13.8 (4.5-37.6)  | 0.0 (-) |
|             | 60          | 0.0 (-) | 30.0 (12.2-62.5) | 40.0 (22.7-63.7) | 39.4 (15.6-77.2) | 46.0 (22.9-76.8) | 0.0 (-) |
|             | 70          | 0.0 (-) | -                | 46.7 (27.6-70.6) | 100.0 (-)        | 46.0 (22.9-76.8) | 0.0 (-) |
| Stomach     | 40          | 0.0 (-) | 0.0 (-)          | 0.0 (-)          | 0.0 (-)          | 0.0 (-)          | 0.0 (-) |
|             | 50          | 0.0 (-) | 0.0 (-)          | 0.0 (-)          | 0.0 (-)          | 0.0 (-)          | 0.0 (-) |
|             | 60          | 0.0 (-) | 1.6 (0.2-10.6)   | 1.6 (0.4-6.5)    | 1.5 (0.2-10.1)   | 1.8 (0.3-12.2)   | 0.0 (-) |
|             | 70          | 0.0 (-) | 7.7 (1.6-33.4)   | 2.9 (0.9-9.1)    | 1.5 (0.2-10.1)   | 4.4 (1.1-16.8)   | 0.0 (-) |
| Small bowel | 40          | 0.0 (-) | 0.0 (-)          | 0.0 (-)          | 0.0 (-)          | 0.0 (-)          | 0.0 (-) |
|             | 50          | 0.0 (-) | 0.0 (-)          | 2.5 (0.8-7.6)    | 0.0 (-)          | 4.8 (1.6-14.3)   | 0.0 (-) |
|             | 60          | 0.0 (-) | 0.0 (-)          | 7.5 (3.9-13.9)   | 4.0 (1.0-15.1)   | 10.7 (5.2-21.2)  | 0.0 (-) |
|             | 70          | 0.0 (-) | 0.0 (-)          | 12.6 (7.4-21.2)  | 10.1 (3.8-25.5)  | 16.4 (8.6-30.3)  | 0.0 (-) |
| Urothelial  | 40          | 0.0 (-) | 0.0 (-)          | 0.0 (-)          | 0.0 (-)          | 0.0 (-)          | 0.0 (-) |
|             | 50          | 0.0 (-) | 0.0 (-)          | 3.8 (1.6-9.0)    | 1.5 (0.2-10.0)   | 6.2 (2.3-15.9)   | 0.0 (-) |
|             | 60          | 0.0 (-) | 0.0 (-)          | 8.6 (4.8-15.2)   | 8.5 (3.2-21.4)   | 10.2 (5.0-20.3)  | 0.0 (-) |
|             | 70          | 0.0 (-) | 6.2 (0.9-36.8)   | 15.8 (9.6-25.2)  | 18.3 (8.9-35.6)  | 16.3 (8.4-30.4)  | 0.0 (-) |

**Figure S7:** Age-dependent cumulative cancer risks by risk group and sex.

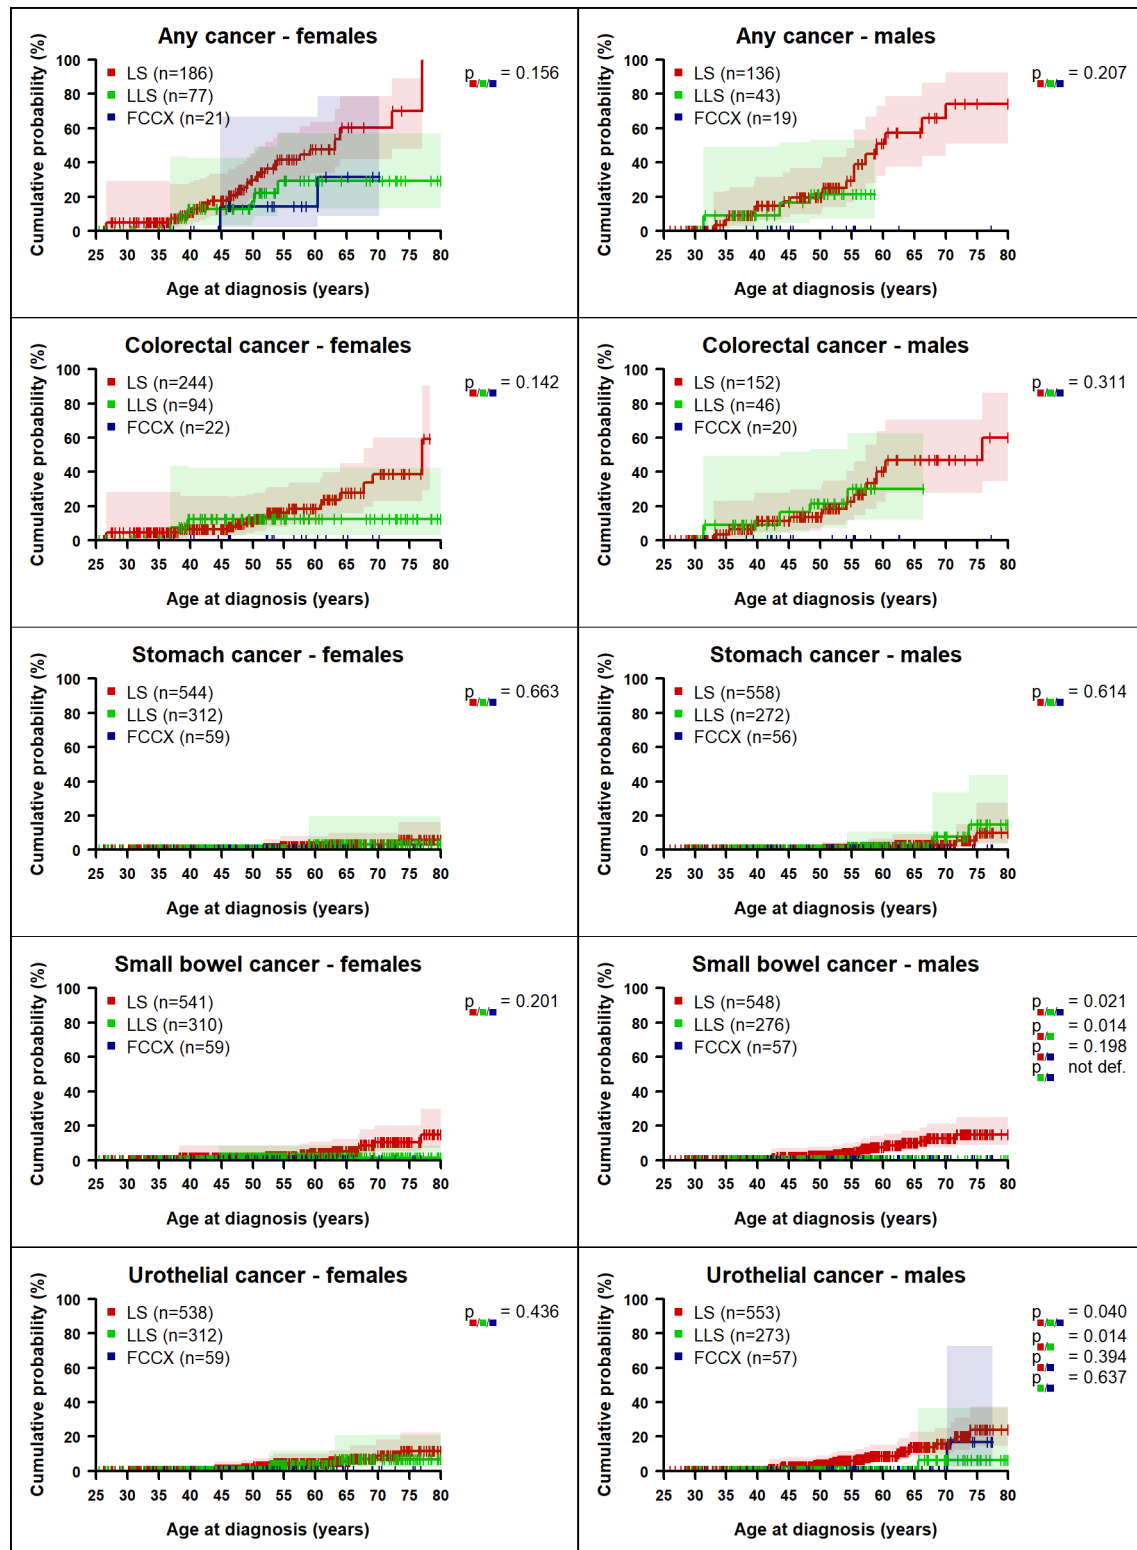

not def. = not definable

Shaded areas indicate 95% confidence intervals.



**Figure S8:** Age-dependent cumulative cancer risks of LS patients by gene and sex.

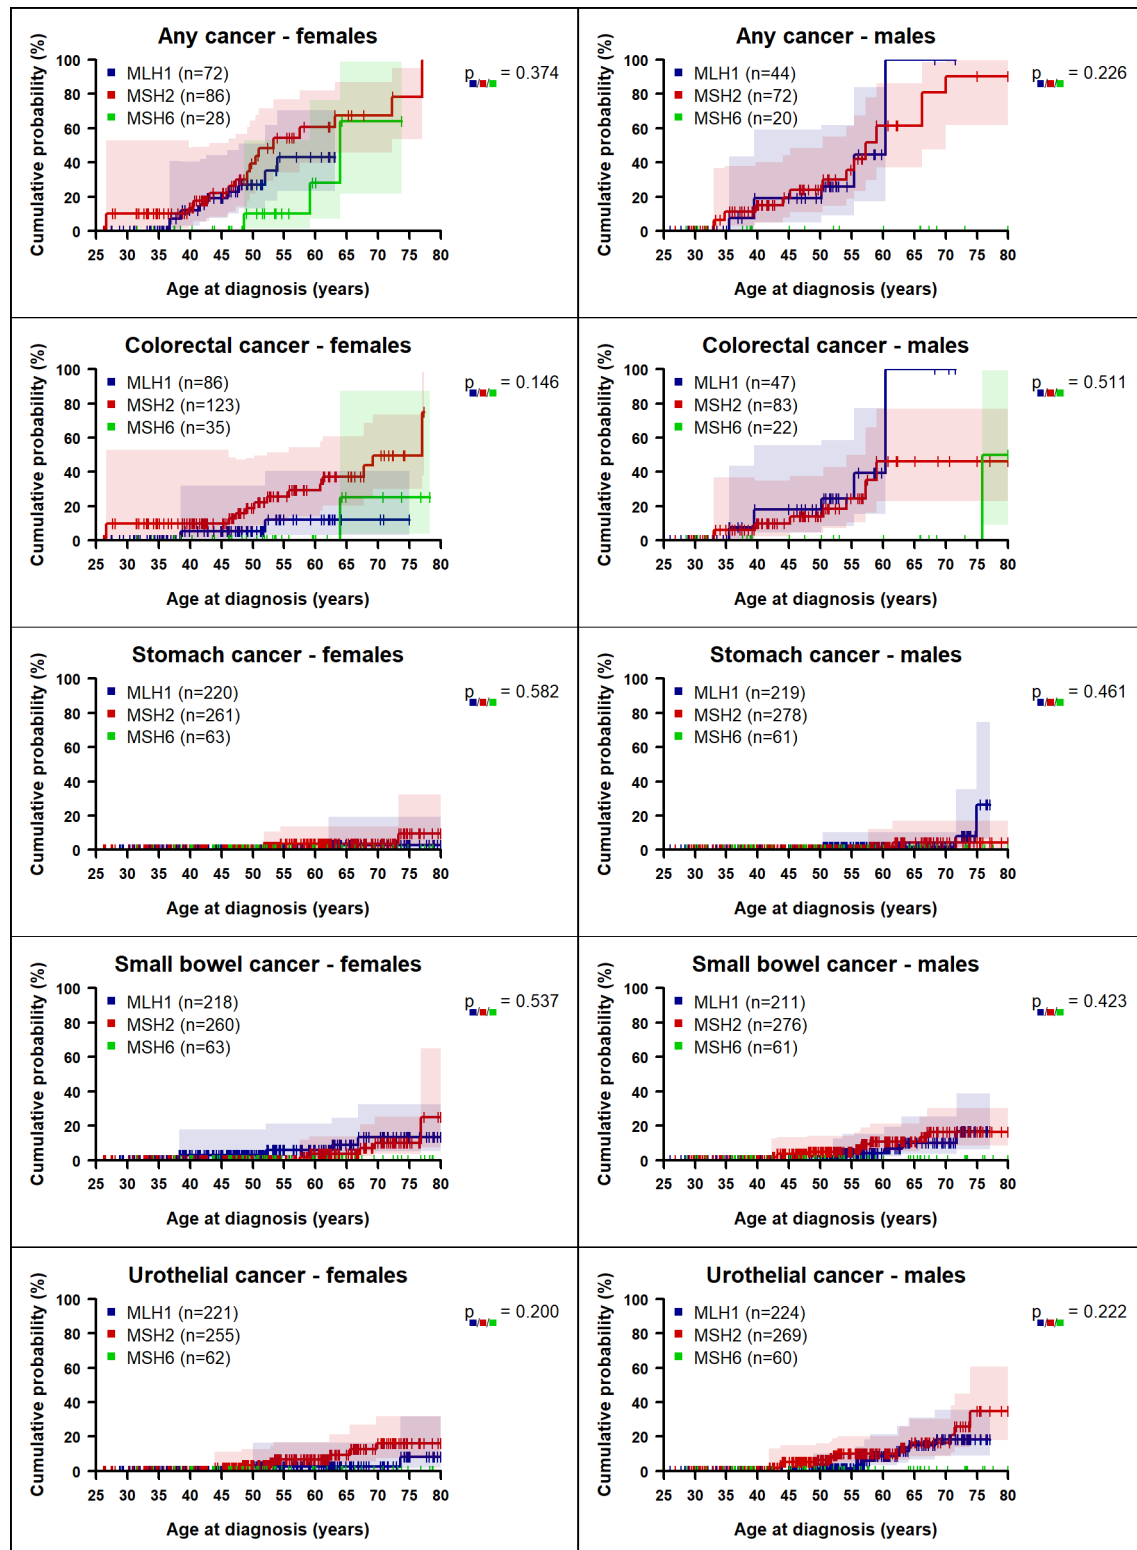

Shaded areas indicate 95% confidence intervals.

**Figure S9:** Comparison with general population risks: standardised incidence ratios (SIRs) with 95% confidence interval for female patients.

| Cancer type | Risk group                                                                                               | LS by gene                                                                                                  |
|-------------|----------------------------------------------------------------------------------------------------------|-------------------------------------------------------------------------------------------------------------|
| Any*        | LS 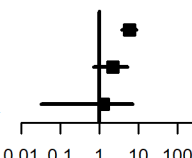 5.9 (3.8-8.7)       | MLH1  5.6 (2.4-10.9)      |
|             | LLS  2.2 (0.7-5.2)      | MSH2  7.2 (3.9-12.4)      |
|             | FCCX  1.3 (0.0-7.1)     | MSH6  3.5 (0.7-10.3)      |
| Colorectal  | LS  23.6 (13.2-38.9)    | MLH1  13.9 (1.7-50.1)     |
|             | LLS  6.3 (0.8-22.7)     | MSH2  33.1 (17.1-57.8)    |
|             | FCCX  0.0 (0.0-50.7)    | MSH6  7.7 (0.2-43.0)      |
| Stomach     | LS  7.7 (2.1-19.8)      | MLH1  5.1 (0.1-28.3)      |
|             | LLS  3.8 (0.1-21.3)     | MSH2  11.7 (2.4-34.3)     |
|             | FCCX  0.0 (0.0-70.8)    | MSH6  0.0 (0.0-57.2)      |
| Small bowel | LS  115.1 (52.6-218.5) | MLH1  136.1 (37.1-348.6) |
|             | LLS  25.5 (0.6-142.1)  | MSH2  127.8 (41.5-298.3) |
|             | FCCX  0.0 (0.0-430.0) | MSH6  0.0 (0.0-380.0)   |
| Urothelial  | LS  27.7 (12.7-52.6)  | MLH1  15.4 (1.9-55.8)   |
|             | LLS  18.2 (3.8-53.2)  | MSH2  45.7 (18.4-94.1)  |
|             | FCCX  0.0 (0.0-111.8) | MSH6  0.0 (0.0-87.7)    |

\* Without malignant neoplasms of skin except melanoma

**Figure S10:** Comparison with general population risks: standardised incidence ratios (SIRs) with 95% confidence interval for male patients.

| Cancer type | Risk group                                                                                               | LS by gene                                                                                                  |
|-------------|----------------------------------------------------------------------------------------------------------|-------------------------------------------------------------------------------------------------------------|
| Any*        | LS 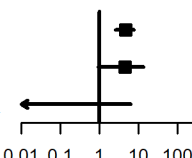 4.7 (2.6-7.7)       | MLH1  6.6 (2.2-15.5)      |
|             | LLS  4.5 (0.9-13.3)     | MSH2  6.0 (2.9-11.1)      |
|             | FCCX  0.0 (0.0-6.3)     | MSH6  0.0 (0.0-4.6)       |
| Colorectal  | LS  25.2 (13.4-43.2)    | MLH1  51.0 (16.5-118.9)   |
|             | LLS  46.1 (12.6-118.1)  | MSH2  24.6 (9.9-50.7)     |
|             | FCCX  0.0 (0.0-44.0)    | MSH6  7.6 (0.2-42.1)      |
| Stomach     | LS  5.2 (1.7-12.2)      | MLH1  8.2 (1.7-24.1)      |
|             | LLS  7.7 (1.6-22.5)     | MSH2  4.2 (0.5-15.1)      |
|             | FCCX  0.0 (0.0-30.8)    | MSH6  0.0 (0.0-31.5)      |
| Small bowel | LS  134.1 (73.3-225.1) | MLH1  126.8 (41.2-295.9) |
|             | LLS  0.0 (0.0-82.2)    | MSH2  169.5 (77.5-321.8) |
|             | FCCX  0.0 (0.0-284.9) | MSH6  0.0 (0.0-311.4)   |
| Urothelial  | LS  18.4 (11.1-28.7)  | MLH1  16.4 (6.6-33.9)   |
|             | LLS  2.2 (0.1-12.5)   | MSH2  25.2 (13.0-44.0)  |
|             | FCCX  7.0 (0.2-38.7)  | MSH6  0.0 (0.0-28.2)    |

\* Without malignant neoplasms of skin except melanoma
